# Supplementary material for: Beef Intake Is Associated with Higher Nutrient Intake and Nutrient Adequacy in U.S. Adolescents, NHANES 2001–2018
Source: MDPI journal article supplement (doi:10.3390/nu15234996), 2023-12-02
Supplement: s1 [file s1]

**Supplementary Table S1.** Demographics<sup>1</sup> of beef consumers<sup>2</sup> compared to non-consumers in U.S. adolescents (14–18 y).

| Demographic Variable          | Total<br>Population<br>Mean (SE) | Non-<br>Consumers<br>Mean (SE) | Consumers<br>Mean (SE) | Consumers vs. Non-<br>consumers<br>Beta (SE) | P             |
|-------------------------------|----------------------------------|--------------------------------|------------------------|----------------------------------------------|---------------|
| <b>Females (n=1,293)</b>      |                                  |                                |                        |                                              |               |
| Age (mean)                    | 16.03 (0.06)                     | 16.04 (0.12)                   | 16.02 (0.08)           | -0.02 (0.15)                                 | 0.8811        |
| Ethnicity (%)                 |                                  |                                |                        |                                              |               |
| Hispanic                      | 22.35 (2.24)                     | 23.08 (2.75)                   | 21.99 (2.74)           | -1.09 (3.40)                                 | 0.7498        |
| Non-Hispanic White            | 52.36 (3.44)                     | 47.35 (4.32)                   | 54.80 (4.07)           | 7.44 (5.15)                                  | 0.1530        |
| Non-Hispanic Black            | 15.38 (2.05)                     | 15.11 (2.99)                   | 15.51 (2.06)           | 0.39 (2.66)                                  | 0.8828        |
| Non-Hispanic Asian            | 5.16 (0.92)                      | 8.38 (1.64)                    | 3.60 (0.94)            | -4.77 (1.71)                                 | <b>0.0069</b> |
| Poverty Income Ratio (PIR; %) |                                  |                                |                        |                                              |               |
| PIR < 1.35                    | 32.63 (2.87)                     | 27.60 (3.61)                   | 35.08 (3.56)           | 7.48 (4.57)                                  | 0.1068        |
| 1.35 ≤ PIR ≤ 1.85             | 11.31 (1.61)                     | 10.13 (1.70)                   | 11.89 (2.14)           | 1.76 (2.53)                                  | 0.4879        |
| PIR > 1.85                    | 56.06 (3.19)                     | 62.27 (3.78)                   | 53.03 (3.97)           | -9.24 (4.78)                                 | 0.0576        |
| Physical Activity (%)         |                                  |                                |                        |                                              |               |
| Sedentary                     | 21.46 (1.88)                     | 24.34 (2.91)                   | 20.06 (2.60)           | -4.28 (4.14)                                 | 0.3052        |
| Moderate                      | 32.32 (2.24)                     | 28.41 (3.37)                   | 34.21 (3.13)           | 5.80 (4.84)                                  | 0.2355        |
| Vigorous                      | 46.23 (2.47)                     | 47.25 (3.54)                   | 45.73 (2.97)           | -1.52 (4.20)                                 | 0.7193        |
| Smoking Status (%)            |                                  |                                |                        |                                              |               |
| Never                         | 78.27 (2.55)                     | 81.57 (3.53)                   | 76.66 (2.90)           | -4.91 (3.97)                                 | 0.2211        |
| Current                       | 2.37 (0.83)                      | 2.12 (1.40)                    | 2.49 (1.03)            | 0.37 (1.75)                                  | 0.8334        |
| Weight Status (%)             |                                  |                                |                        |                                              |               |
| Overweight                    | 16.32 (1.26)                     | 18.40 (2.58)                   | 15.32 (1.64)           | -3.08 (3.30)                                 | 0.3543        |
| Obese                         | 21.74 (1.76)                     | 20.02 (2.78)                   | 22.57 (2.42)           | 2.55 (3.91)                                  | 0.5171        |
| <b>Males (n=1,268)</b>        |                                  |                                |                        |                                              |               |
| Age (mean)                    | 16.00 (0.06)                     | 16.11 (0.15)                   | 15.97 (0.07)           | -0.14 (0.16)                                 | 0.3954        |
| Ethnicity (%)                 |                                  |                                |                        |                                              |               |
| Hispanic                      | 24.84 (2.73)                     | 25.35 (5.91)                   | 24.71 (2.69)           | -0.64 (5.76)                                 | 0.9121        |
| Non-Hispanic White            | 49.91 (3.34)                     | 45.07 (6.11)                   | 51.11 (3.41)           | 6.05 (5.94)                                  | 0.3124        |
| Non-Hispanic Black            | 14.56 (1.96)                     | 16.46 (3.25)                   | 14.10 (2.09)           | -2.36 (3.32)                                 | 0.4800        |
| Non-Hispanic Asian            | 4.76 (0.86)                      | 9.54 (2.36)                    | 3.58 (0.60)            | -5.96 (2.06)                                 | <b>0.0053</b> |
| Poverty Income Ratio (PIR; %) |                                  |                                |                        |                                              |               |
| PIR < 1.35                    | 33.06 (2.46)                     | 29.14 (5.20)                   | 33.95 (2.67)           | 4.80 (5.64)                                  | 0.3977        |
| 1.35 ≤ PIR ≤ 1.85             | 10.93 (1.56)                     | 11.97 (3.54)                   | 10.69 (1.61)           | -1.28 (3.63)                                 | 0.7263        |
| PIR > 1.85                    | 56.01 (2.99)                     | 58.89 (6.03)                   | 55.36 (3.10)           | -3.53 (6.11)                                 | 0.5657        |
| Physical Activity (%)         |                                  |                                |                        |                                              |               |
| Sedentary                     | 11.57 (1.36)                     | 12.75 (3.59)                   | 11.27 (1.51)           | -1.47 (4.02)                                 | 0.7153        |
| Moderate                      | 26.77 (2.46)                     | 33.62 (4.38)                   | 25.08 (2.61)           | -8.54 (4.60)                                 | 0.0683        |
| Vigorous                      | 61.66 (2.85)                     | 53.63 (6.00)                   | 63.65 (2.88)           | 10.01 (6.15)                                 | 0.1085        |
| Smoking Status (%)            |                                  |                                |                        |                                              |               |

|                   |              |              |              |               |               |
|-------------------|--------------|--------------|--------------|---------------|---------------|
| Never             | 72.29 (2.24) | 84.67 (3.52) | 69.44 (2.55) | -15.23 (4.25) | <b>0.0007</b> |
| Current           | 4.86 (0.94)  | 0.94 (0.57)  | 5.81 (1.15)  | 4.87 (1.24)   | <b>0.0002</b> |
| Weight Status (%) |              |              |              |               |               |
| Overweight        | 15.76 (1.58) | 13.55 (3.21) | 16.31 (1.83) | 2.76 (3.76)   | 0.4658        |
| Obese             | 21.65 (1.80) | 27.78 (4.97) | 20.14 (1.85) | -7.64 (5.28)  | 0.1536        |

<sup>1</sup> Data Source: NHANES 2001-2018. <sup>2</sup> Beef consumers were defined as subjects with beef intake on day 1 or day 2.
